# Supplementary material for: Effects of Marine n-3 Polyunsaturated Fatty Acids on Heart Rate Variability and Heart Rate in Patients on Chronic Dialysis: A Randomized Controlled Trial
Source: MDPI journal article supplement (doi:10.3390/nu10091313), 2018-09-17
Supplement: s1 [file s1]

## Supplementary Material

**This file contains the following supplementary tables:**

- **Table S1.** Heart rate variability at baseline and after three months supplementation in patients without previous acute myocardial infarction.
- **Table S2.** Heart rate variability at baseline and after three months supplementation in patients on in-center dialysis.
- **Table S3.** Heart rate variability at baseline and after three months supplementation in patients, who took at least 85% of the prescribed capsules (as treated analysis).
- **Table S4.** Fish intake before and after supplementation.

**Table S1.** Heart rate variability at baseline and after three months supplementation in patients without previous acute myocardial infarction.

| Parameters                        | <i>n</i> -3 PUFA ( <i>n</i> = 27) |               |                 | Control ( <i>n</i> = 38) |               |                 | Difference in response <sup>1</sup> | <i>p</i> -Value |
|-----------------------------------|-----------------------------------|---------------|-----------------|--------------------------|---------------|-----------------|-------------------------------------|-----------------|
|                                   | Before                            | After         | <i>p</i> -Value | Before                   | After         | <i>p</i> -Value |                                     |                 |
| Time-domain HRV                   |                                   |               |                 |                          |               |                 |                                     |                 |
| SDNN (ms)                         | 87.5 ± 22.7                       | 90.7 ± 28.8   | 0.33            | 85.8 ± 39.5              | 88.2 ± 31.4   | 0.35            | 0.8 (-7.3; 8.9)                     | 0.84            |
| SDANN (ms)                        | 79.2 ± 20.4                       | 82.1 ± 26.6   | 0.42            | 77.9 ± 36.8              | 81.3 ± 28.7   | 0.17            | -0.4 (-8.8; 8.0)                    | 0.92            |
| SDNNi (ms)                        | 30.1 ± 13.0                       | 30.2 ± 13.8   | 0.88            | 29.2 ± 15.4              | 28.3 ± 14.2   | 0.27            | 1.1 (-1.6; 3.8)                     | 0.41            |
| rMSSD (ms)                        | 14.5 ± 6.9                        | 14.0 ± 6.8    | 0.60            | 14.9 ± 9.1               | 13.5 ± 7.0    | 0.04            | 0.9 (-1.3; 3.2)                     | 0.41            |
| Triangular Index                  | 21.3 ± 6.1                        | 22.6 ± 8.9    | 0.22            | 23.6 ± 12.1              | 23.5 ± 9.4    | 0.091           | 1.5 (-1.5; 4.4)                     | 0.33            |
| Mean RR (ms)                      | 793.8 ± 116.6                     | 803.6 ± 103.3 | 0.46            | 819.4 ± 118.1            | 810.6 ± 112.2 | 0.26            | 18.7 (-10.0; 47.3)                  | 0.20            |
| Mean heart rate (bpm)             | 77.3 ± 12.1                       | 75.9 ± 9.6    | 0.28            | 74.7 ± 10.8              | 75.4 ± 10.3   | 0.36            | -2.1 (-5.0; 0.7)                    | 0.14            |
| Frequency-domain HRV <sup>2</sup> |                                   |               |                 |                          |               |                 |                                     |                 |
| LF (ms <sup>2</sup> )             | 4.86 ± 1.25                       | 4.86 ± 1.38   | 0.99            | 4.47 ± 1.56              | 4.43 ± 1.53   | 0.54            | 0.05 (-0.19; 0.28)                  | 0.70            |
| HF (ms <sup>2</sup> )             | 3.73 ± 0.97                       | 3.67 ± 0.97   | 0.66            | 3.76 ± 1.15              | 3.59 ± 1.19   | 0.06            | 0.11 (-0.21; 0.42)                  | 0.51            |
| LF/HF ratio                       | 1.14 ± 0.81                       | 1.19 ± 0.82   | 0.56            | 0.75 ± 0.97              | 0.85 ± 0.86   | 0.09            | -0.05 (-0.25; 0.16)                 | 0.64            |

Data are mean ± standard deviation or <sup>1</sup>absolute number and 95% confidence interval.

<sup>2</sup>All frequency-domain indices are log-transformed due to skewed data.

PUFA, polyunsaturated fatty acids; HRV, heart rate variability; mean RR, the 24-hour mean value of RR-intervals; SDNN, the 24-hour standard deviation of normal intervals; SDANN, the standard deviation of the mean of RR-intervals in successive 5-minute segments; SDNNi, the mean of the standard deviation of all normal RR-intervals for all 5 minute segments; rMSSD, the square root of the mean of the sum of the squares of differences between adjacent intervals; LF, low frequency; HF, high frequency.

**Table S2.** Heart rate variability at baseline and after three months supplementation in patients on in-center dialysis.

| Parameters                        | <i>n</i> -3 PUFA ( <i>n</i> = 32) |               |                 | Control ( <i>n</i> = 32) |               |                 | Difference in response <sup>1</sup> | <i>p</i> -Value |
|-----------------------------------|-----------------------------------|---------------|-----------------|--------------------------|---------------|-----------------|-------------------------------------|-----------------|
|                                   | Before                            | After         | <i>p</i> -Value | Before                   | After         | <i>p</i> -Value |                                     |                 |
| Time-domain HRV                   |                                   |               |                 |                          |               |                 |                                     |                 |
| SDNN (ms)                         | 84.3 ± 23.7                       | 87.9 ± 26.7   | 0.17            | 83.5 ± 40.3              | 86.8 ± 34.2   | 0.25            | 0.3 (-7.4; 8.0)                     | 0.94            |
| SDANN (ms)                        | 77.4 ± 22.2                       | 81.2 ± 26.2   | 0.17            | 75.8 ± 37.6              | 80.6 ± 32.6   | 0.10            | -1.0 (-8.9; 6.8)                    | 0.80            |
| SDNNi (ms)                        | 26.2 ± 9.1                        | 26.7 ± 9.9    | 0.63            | 28.7 ± 15.6              | 26.5 ± 13.4   | 0.06            | 2.6 (0.3; 4.9)                      | 0.08            |
| rMSSD (ms)                        | 14.1 ± 6.5                        | 14.2 ± 6.3    | 0.91            | 15.0 ± 11.6              | 12.9 ± 10.5   | 0.01            | 2.2 (-0.29; 4.8)                    | 0.08            |
| Triangular Index                  | 19.9 ± 4.7                        | 21.8 ± 6.6    | 0.04            | 22.4 ± 11.6              | 23.4 ± 9.8    | 0.33            | 1.0 (-1.6; 3.6)                     | 0.45            |
| Mean RR (ms)                      | 839.9 ± 112.1                     | 860.2 ± 109.7 | 0.06            | 836.9 ± 126.0            | 820.8 ± 111.5 | 0.12            | 36.4 (7.4; 65.3)                    | 0.01            |
| Mean heart rate (bpm)             | 72.8 ± 20.3                       | 70.9 ± 9.0    | 0.054           | 73.4 ± 11.6              | 74.4 ± 9.9    | 0.32            | -2.9 (-5.7; 0.2)                    | 0.04            |
| Frequency-domain HRV <sup>2</sup> |                                   |               |                 |                          |               |                 |                                     |                 |
| LF (ms <sup>2</sup> )             | 4.35 ± 1.22                       | 4.41 ± 1.21   | 0.51            | 4.35 ± 1.45              | 4.26 ± 1.44   | 0.30            | 0.16 (-0.10; 0.41)                  | 0.23            |
| HF (ms <sup>2</sup> )             | 3.61 ± 0.87                       | 3.62 ± 0.86   | 0.95            | 3.64 ± 1.17              | 3.42 ± 1.16   | 0.04            | 0.01 (-0.08; 0.53)                  | 0.14            |
| LF/HF ratio                       | 0.75 ± 0.84                       | 0.80 ± 0.81   | 0.53            | 0.75 ± 0.92              | 0.85 ± 0.84   | 0.15            | -0.04 (-0.27; 0.18)                 | 0.70            |

Data are mean ± standard deviation or <sup>1</sup>absolute number and 95% confidence interval.

<sup>2</sup>All frequency-domain indices are log-transformed due to skewed data.

PUFA, polyunsaturated fatty acids; HRV, heart rate variability; mean RR, the 24-hour mean value of RR-intervals; SDNN, the 24-hour standard deviation of normal intervals; SDANN, the standard deviation of the mean of RR-intervals in successive 5-minute segments; SDNNi, the mean of the standard deviation of all normal RR-intervals for all 5 minute segments; rMSSD, the square root of the mean of the sum of the squares of differences between adjacent intervals; LF, low frequency; HF, high frequency.

**Table S3.** Heart rate variability at baseline and after three months supplementation in patients, who took at least 85% of the prescribed capsules (as treated analysis).

| Parameters                        | <i>n</i> -3 PUFA ( <i>n</i> = 34) |               |                 | Control ( <i>n</i> = 34) |              |                 | Difference in response <sup>1</sup> |                 |
|-----------------------------------|-----------------------------------|---------------|-----------------|--------------------------|--------------|-----------------|-------------------------------------|-----------------|
|                                   | Before                            | After         | <i>p</i> -Value | Before                   | After        | <i>p</i> -Value |                                     | <i>p</i> -Value |
| Time-domain HRV                   |                                   |               |                 |                          |              |                 |                                     |                 |
| SDNN (ms)                         | 83.8 ± 24.6                       | 88.1 ± 25.9   | 0.08            | 94.9 ± 37.8              | 96.9 ± 30.7  | 0.49            | 2.3 (-5.3; 9.8)                     | 0.55            |
| SDANN (ms)                        | 76.1 ± 22.0                       | 80.3 ± 25.1   | 0.11            | 85.7 ± 35.4              | 89.1 ± 29.0  | 0.26            | 0.8 (-7.0; 8.6)                     | 0.84            |
| SDNNi (ms)                        | 28.2 ± 12.0                       | 29.4 ± 11.9   | 0.23            | 33.2 ± 15.0              | 31.8 ± 13.0  | 0.17            | 2.6 (-0.2; 5.5)                     | 0.07            |
| rMSSD (ms)                        | 15.3 ± 7.2                        | 15.7 ± 6.7    | 0.67            | 16.5 ± 9.4               | 14.9 ± 6.8   | 0.05            | 2.0 (-0.47; 4.5)                    | 0.11            |
| Triangular Index                  | 20.5 ± 5.7                        | 22.7 ± 7.0    | 0.02            | 26.2 ± 11.7              | 26.4 ± 8.9   | 0.82            | 1.9 (-0.9; 4.7)                     | 0.17            |
| Mean RR (ms)                      | 816.7 ± 122.1                     | 839.3 ± 119.1 | 0.01            | 849.1 ± 105.4            | 836.1 ± 97.8 | 0.22            | 35.6 (8.7; 62.6)                    | 0.01            |
| Mean heart rate (bpm)             | 75.2 ± 11.9                       | 72.9 ± 10.2   | 0.02            | 71.7 ± 8.6               | 72.7 ± 8.0   | 0.30            | -3.3 (-5.0; 0.1)                    | 0.01            |
| Frequency-domain HRV <sup>2</sup> |                                   |               |                 |                          |              |                 |                                     |                 |
| LF (ms <sup>2</sup> )             | 4.65 ± 1.22                       | 4.74 ± 1.20   | 0.34            | 4.89 ± 1.19              | 4.88 ± 1.11  | 0.85            | 0.1 (-0.13; 0.34)                   | 0.39            |
| HF (ms <sup>2</sup> )             | 3.76 ± 0.97                       | 3.83 ± 0.88   | 0.57            | 3.98 ± 1.11              | 3.88 ± 1.05  | 0.26            | 0.16 (-0.12; 0.46)                  | 0.25            |
| LF/HF ratio                       | 0.89 ± 0.88                       | 0.92 ± 0.82   | 0.69            | 0.94 ± 0.81              | 1.01 ± 0.72  | 0.25            | -0.03 (-0.25; 0.18)                 | 0.76            |

Data are mean ± standard deviation or <sup>1</sup>absolute number and 95% confidence interval.

<sup>2</sup>All frequency-domain indices are log-transformed due to skewed data.

PUFA, polyunsaturated fatty acids; HRV, heart rate variability; mean RR, the 24-hour mean value of RR-intervals; SDNN, the 24-hour standard deviation of normal intervals; SDANN, the standard deviation of the mean of RR-intervals in successive 5-minute segments; SDNNi, the mean of the standard deviation of all normal RR-intervals for all 5 minute segments; rMSSD, the square root of the mean of the sum of the squares of differences between adjacent intervals; LF, low frequency; HF, high frequency.

**Table S4.** Fish intake before and after supplementation.

| Parameter               | <i>n</i> -3 PUFA ( <i>n</i> = 42) |           |                 | Control ( <i>n</i> = 43) |           |                 | Difference in response <sup>1</sup> |                 |
|-------------------------|-----------------------------------|-----------|-----------------|--------------------------|-----------|-----------------|-------------------------------------|-----------------|
|                         | Before                            | After     | <i>p</i> -Value | Before                   | After     | <i>p</i> -Value |                                     | <i>p</i> -Value |
| Fish score <sup>2</sup> | 6.8 ± 2.6                         | 6.8 ± 2.6 | 1.0             | 7.0 ± 2.4                | 6.7 ± 2.6 | 0.39            | 0.2 (-0.4; 0.9 )                    | 0.52            |

Data are mean ± standard deviation or <sup>1</sup>absolute number and 95% confidence interval.

<sup>2</sup>Fish intake assessed by a questionnaire with two questions: 1. How often do you eat fish for lunch? and 2. How often do you eat fish for dinner? A score was given according to the following: never eating fish=1; eating fish once a month=2, eating fish 2-3 times a month=3, eating fish once a week=4, eating fish 2-3 times a week=5 and eating fish every day=6. Hence, the total fish score for lunch and dinner could range from 2-12.
